## RESEARCH ARTICLE

# Field-based molecular detection of *Batrachochytrium dendrobatidis* in critically endangered *Atelopus* toads and aquatic habitats in Ecuador

Lenin R. Riascos-Flores<sup>1,2</sup>, Julio Bonilla<sup>1,2</sup>, Leopoldo Naranjo-Briceño<sup>3,4</sup>, Katherine Apunte-Ramos<sup>5</sup>, Grace C. Reyes-Ortega<sup>6</sup>, Marcela Cabrera<sup>7,8</sup>, José F. Cáceres-Andrade<sup>9</sup>, Andrea Carrera-Gonzalez<sup>5</sup>, Jomira K. Yáñez-Galarza<sup>10,3,6</sup>, Fausto Siavichay Pesántez<sup>10</sup>, Luis A. Oyagata-Cachimuel<sup>11</sup>, Peter Goethals<sup>1</sup>, Jorge Celi<sup>12</sup>, Christine Van der Heyden<sup>13</sup>, H. Mauricio Ortega-Andrade<sup>10,6,11\*</sup>

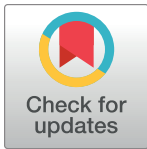

**1** Department of Animal Sciences and Aquatic Ecology, Faculty of Bioscience Engineering, Gent University, Gent, Belgium, **2** Escuela Superior Politécnica del Litoral, ESPOL/Facultad de Ciencias de la Vida, Centro de Investigaciones Biotecnológicas del Ecuador, Campus Gustavo Galindo Guayaquil, Guayaquil, Ecuador, **3** Applied Microbiology Research Group, Life Sciences Faculty, Universidad Regional Amazónica IKIAM, Tena, Ecuador, **4** Fungal Biotech Lab, Spora Biotech, Huechuraba, Santiago, Región Metropolitana, Chile, **5** Molecular Biology and Biochemistry Lab, Universidad Regional Amazónica IKIAM, Tena, Ecuador, **6** Biogeography and Spatial Ecology Research Group, Life Sciences Faculty, Universidad Regional Amazónica IKIAM, Tena, Ecuador, **7** Laboratorio Nacional de Referencia del Agua, Universidad Regional Amazónica Ikiam, Tena, Ecuador, **8** University of Valencia, Paterna, Spain, **9** Parque Nacional Cajas ETAPA EP, Cuenca, Ecuador, **10** Centro de Conservación de Anfibios AMARU, Cuenca, Ecuador, **11** Herpetology Division, Instituto Nacional de Biodiversidad, Quito, Pichincha, Ecuador, **12** Water and Aquatic Resources Research Group, School of Earth and Water Sciences, Universidad Regional Amazónica Ikiam, Tena, Ecuador, **13** Department of Biosciences and Industrial Technology, Health and Water Technology Research Centre, HOGENT—University of Applied Sciences and Arts, Gent, Belgium

\* [mauricio.ortega@ikiam.edu.ec](mailto:mauricio.ortega@ikiam.edu.ec)

## OPEN ACCESS

**Citation:** Riascos-Flores LR, Bonilla J, Naranjo-Briceño L, Apunte-Ramos K, Reyes-Ortega GC, Cabrera M, et al. (2024) Field-based molecular detection of *Batrachochytrium dendrobatidis* in critically endangered *Atelopus* toads and aquatic habitats in Ecuador. PLoS ONE 19(3): e0299246. <https://doi.org/10.1371/journal.pone.0299246>

**Editor:** António Machado, Universidad San Francisco de Quito, ECUADOR

**Received:** April 16, 2023

**Accepted:** February 6, 2024

**Published:** March 14, 2024

**Peer Review History:** PLOS recognizes the benefits of transparency in the peer review process; therefore, we enable the publication of all of the content of peer review and author responses alongside final, published articles. The editorial history of this article is available here: <https://doi.org/10.1371/journal.pone.0299246>

**Copyright:** © 2024 Riascos-Flores et al. This is an open access article distributed under the terms of the [Creative Commons Attribution License](https://creativecommons.org/licenses/by/4.0/), which permits unrestricted use, distribution, and reproduction in any medium, provided the original author and source are credited.

**Data Availability Statement:** All relevant data are within the manuscript and its [Supporting Information](#) files.

## Abstract

*Batrachochytrium dendrobatidis* (Bd) is a lethal fungal species that parasitizes vertebrates and is associated with the worldwide decline of amphibian populations. The development of sensitive, rapid detection methods, particularly DNA-based techniques, is critical for effective management strategies. This study evaluates the efficacy of DNA extraction and a portable PCR device in a mountable field laboratory setup for detecting Bd near the habitats of three critically endangered *Atelopus* toad species in Ecuador. We collected skin swabs from *Atelopus balios*, *A. nanay*, and *A. bomolochos*, and environmental DNA (eDNA) samples from streams in Andean and coastal regions of Ecuador. For eDNA, a comparison was made with duplicates of the samples that were processed in the field and in a standard university laboratory. Our findings revealed Bd detection in eDNA and swabs from 6 of 12 water samples and 10 of 12 amphibian swab samples. The eDNA results obtained in the field laboratory were concordant with those obtained under campus laboratory conditions. These findings highlight the potential of field DNA-based monitoring techniques for detecting Bd in amphibian populations and their aquatic habitats, particularly in remote areas. Furthermore, this research aligns with the National Action Plan for the Conservation of Ecuadorian Amphibians and contributes to the global effort to control this invasive and deadly fungus.

**Funding:** CVdH: “Networks 2019 phase 2 Ecuador biodiversity project”, the VLIR-UOS South Initiative ZEIN 2014Z15. CVdH, JC, JB, HMOA: “DNA-based monitoring for assessing the effect of invasive species on aquatic communities in the Amazon basin of Ecuador”, the VLIR-UOS South Initiative EC 2020 SIN 277B125 “Biomonitoring of aquatic environments in the Amazon using environmental DNA” HMOA: “Conservation of Ecuadorian Amphibians and access to genetic resources-PARG” managed by the Ministry of Environment and Water of Ecuador; Project “On the quest of the golden fleece in Amazonia: The first herpetological DNA - barcoding expedition to unexplored areas on the Napo watershed, Ecuador”, funded by the Secretaría Nacional de Ciencia y Tecnología del Ecuador (Senescyt-ENSAMBLE Grant #PIC-17-BENS-001), The World Academy of Sciences (TWAS Grant #16-095), Erasmus+ CBHE consortium “Nature-based living-lab for interdisciplinary practical and research semester on sustainable development and environmental protection in the Amazona Rainforest [NB-LAB]” (Grant number: 619346-EPP-12020-1-DE-EPPKA2-CBHE-JP). The funders had no role in study design, data collection and analysis, decision to publish, or preparation of the manuscript.

**Competing interests:** The authors have declared that no competing interests exist.

## Introduction

The emerging disease chytridiomycosis, caused by the pathogen *Batrachochytrium dendrobatidis* (Bd), is a disease that has affected the three orders of amphibians (anura, urodela, and gymnophiona). This disease continues to threaten these populations, mainly due to expansion of human activity [1]. After a massive mortality event of frogs in Australia and Central America [2] and the reports of extensive propagation worldwide, Bd has been reported in over 700 species of amphibians [3, 4]. This pathogen is implicated in the decline of about 501 amphibian species and is linked to 90 possible extinctions worldwide [5, 6]. The highest rates of amphibian mortality and extinction attributed to Bd have predominantly occurred in the Americas and Oceania [7]. In South America, a significant mass die-off event occurred in the mid-2000s [5, 8]. This event profoundly impacted Ecuador, leading to the recognition of Bd as a major threat to local amphibian populations with *Atelopus* toads among the species most severely affected [9].

Bd transmission occurs through animal contact or via waterborne motile zoospores [10]. Detection of Bd in amphibian hosts, including larvae, metamorphs, and adults, is achieved through various methods. These include visual inspection of tadpoles, fungal culture, light microscopy, immune histochemistry, electron microscopy, immuno-electron microscopy, and polymerase chain reaction (PCR) [11, 12]. However, with the advances in genetics and genomic technologies, molecular techniques (PCR and qPCR) have become the most common and reliable methods for Bd identification [13–15].

*Atelopus* toads (Anura: Bufonidae) represent one of the most threatened amphibian groups worldwide, with at least 80% of their species facing the risk of extinction [16]. In Ecuador, this risk escalates to 100% for the 25 species identified [9]. In response, the Environmental Ministry of Ecuador initiated a national program in 2015, named project PARG, dedicated to the conservation of Ecuadorian amphibian biodiversity and the sustainable use of genetic resources. This program includes biomonitoring of key frog species in the country [17]. Among these are three *Atelopus* species, classified as critically endangered: *A. nanay* and *A. bomolochos*, endemic to the Central Andes highlands, and *A. balios*, endemic to the coastal region of the country [18]. The habitats of these species have been severely degraded by the cumulative impacts of human activities, climate change, and invasive species [9, 19, 20].

Effective control and management of Bd infections worldwide require comprehensive monitoring, including abiotic factors, such as physicochemical and environmental conditions, and biotic elements, including ecological interactions and species niches [21, 22]. Nonetheless, in developing countries, monitoring efforts often encounter significant challenges despite the regions' rich biodiversity and numerous species susceptible to Bd [16, 23]. These challenges include the high cost of equipment, limited access to well-equipped laboratory facilities, a scarcity of reagents, and complex bureaucratic procedures for importing materials [24, 25]. In this context, utilizing portable and low-cost sequencing devices for pathogen surveillance has emerged as a practical approach to assess biological diversity in global biodiversity hotspots [26–29]. Consequently, the primary aim of this study is to assess the reliability and accuracy of a field laboratory in detecting Bd within native populations of three endangered *Atelopus* toad species in the Central Andean highlands and coastal regions of Ecuador.

## Materials and methods

### Ethical statement

The Ministry of Environment of Ecuador provided the research permits “MAE-DNB-CM-2017-0062” and “MAATE-DBI-CM-2021-0177”. No specimens were collected in this study.

### Study area

For this study, several factors were considered in selecting locations and species: Firstly, in the last five years, reports have indicated the persistence of Bd in isolated populations in the southern Andes of Ecuador [30, 31]. This influenced the choice of species, which was further limited by the small remaining populations. For instance, *A. bomolochos*, once thought to be extinct, was rediscovered in 2015 when a few individuals were sighted [32]. Another consideration was the sampling area limitations; for example, *A. bomolochos* and *A. nanay* are confined to the highlands of Cajas National Park in Azuay, Ecuador. These species face imminent extinction risks, with their habitats restricted to approximately 60 km<sup>2</sup> [9]. Finally, human interactions were taken into account; since 2015, the remaining individuals of the *A. Balios* specie in the “El Naranjal” area have been living in close proximity to agricultural activities [17].

During the monitoring phase, field laboratories were established near the monitoring sites. These labs, were designed to replicate the capabilities of a standard laboratory for sample processing and analysis. They were equipped with portable instruments such as PCR machines, centrifuges, vortex mixers, and electrophoresis chambers. The establishment of these field laboratories was driven by a dual purpose: firstly, to minimize the distances required for sample transportation, thereby reducing the risk of DNA degradation; and secondly, to enable the replication of laboratory conditions in remote and isolated locations, far from conventional research centers or universities.

Specific sampling sites were selected based on prior reports on the distributional range of three *Atelopus* species [9, 18] and the biomonitoring sites established by project PARG [17]. The travel time taken between the sampling sites and the field laboratory ranged from 2 to 4 hours. In contrast, transporting these samples to the university campus for processing took an additional two to three days by road.

Skin swabs and water samples were collected between 4–8th October 2020 in two localities from Azuay province: Cerro Negro (CN), 3.15675° S, 78.84538° W, 3064 m.a.s.l. (4 sites, *Atelopus bomolochos*), Sig Sig–Angas (A), Parque Nacional Cajas, 2.88337° S, 79.30685° W, 3800 m.a.s.l. (4 sites; *Atelopus nanay*); and two localities from Guayas province for *Atelopus balios*: Cerro de Hayas (CH), 2.72452° S, 79.61892° W, 107 m.a.s.l. (2 sites), Comunidad San Miguel, Estero Arenas (EA), 2.75077° S, 79.01269° W, 203 m.a.s.l. (4 sites; See [S1 Table](#) for specific site description). Each site was located, at least, 100 m apart of distance.

### Amphibian sampling

Due to the limited number of adult specimens in the sampled areas [30, 31], amphibian sampling required a collaborative effort by a team of four to seven people. We followed biosafety protocols for handling specimens [33]. Specimens were captured by hand in the field using new nitrile gloves for each specimen captured. Skin sampling was performed using a sterile citoswab series® microbiological collection and transport system (Amies Charcoal Gel 2120–0025) in accordance with the protocols established by Angulo et al. [33].

During sampling specimens were sprayed with sterile MilliQ water. Swabbing was performed in skin areas—belly, groin, legs, feet, and hands—using a single swab for each specimen [33]. The swab was then stored in a 1.5mL microtube containing 400µL of lysis buffer (Tris-

HCl 0.18 M; EDTA 10 mM, SDS 1%, pH 8.2) and maintained in a cooler box. After sampling, specimens were released at the same place of capture. No specimens were euthanized.

### Water collection

Stream sampling methods in this study were based on those described by Quilumbaquin et al. [28]. Before arriving at the sampling sites and starting eDNA sampling, all materials were disinfected in the laboratory using a sodium hypochlorite solution (1/5 of the commercial solution), following the protocol from Geerts *et al.* [34]. The disinfection process included filtration systems and sampling bottles used at each site. To assess potential contamination, a blank sample (sterilized distilled water) was processed for each location. Field materials such as scissors and forceps were sterilized by rinsing with 96% ethanol followed by flame sterilization.

At each site, one liter of water was collected, dividing it into three approximately 350 ml samples taken from three points 10 meters apart. The water sample were then filtered over a 0.45  $\mu\text{m}$  pore-sized nitrocellulose filter of 47 mm diameter (Porafil®). The filtering process utilized a Gast DOA-P704-AA High-Capacity Vacuum Pump and sterilized Nalgene filtration devices (ThermoFisher Scientific). To avoid cross contamination, 1 L of sterilized distilled water was filtered as a negative control before processing the samples. This process was repeated for each location.

Before extracting eDNA in the field-lab, filters were cut in half. One half was used to extract DNA in the field using portable devices, while the other half was stored at  $-20^{\circ}\text{C}$  for later extraction in the university laboratory. Each half of the filter was cut into small 1 to 2 mm strips. These strips were handled with sterilized tools and were stored in sterile 1.5 ml Eppendorf tubes. Eppendorf tubes were cooled or frozen for field and university laboratories, respectively. Tools were sterilized between filtering steps by rinsing with 96% ethanol, and flame sterilization.

### DNA extraction from skin swabs and water samples

The detailed protocols for collecting, extracting and amplifying DNA from water samples and skin swabs for the detection of Bd using field devices are described in [S1 File](#) and in previous studies [34, 35]. During laboratory work and sample preparation, specifically for skin swabs, disposable gloves were worn and replaced between each sample to prevent cross-contamination. To prevent contamination in the field laboratory, a dedicated table was allocated for the preparation of the PCR master mix. Additionally, gel electrophoresis and PCR thermal cycling were performed in separate areas ([Fig 1](#)).

Extraction of fungal DNA from skin swabs was performed using and adapted version from the Wizard® Genomic DNA Purification Kit (Promega Cat. # A1120). The DNA extraction protocol was performed as follows: Swabs were mixed in 300  $\mu\text{L}$  of Lysis buffer (Tris-HCl 0.18 M; EDTA 10 mM; SDS 1%, pH 8.2). Then, the swabs were removed using sterile tweezers. 10 $\mu\text{L}$  of Proteinase K (50 $\mu\text{g}/\mu\text{L}$ ) (Invitrogen Cat. # QS0511) was added. After mixing by vortexing for 20 s at maximum speed (Vortex V-1 plus), the tubes were incubated on a thermoblock at  $65^{\circ}\text{C}$  for 30 min. Then, 2.5  $\mu\text{L}$  RNase (10 mg/mL) (Thermo Scientific, Cat. # EN0531) was added and mixed by pipetting before incubation at  $37^{\circ}\text{C}$  for 10 min.

For cells and protein precipitation, 100 $\mu\text{L}$  of protein precipitation solution (Promega) was added and vortexed for 20s, followed by incubation for 10 min on ice. After centrifugation at 12000 rpm for 5 min, the supernatant was recovered and transferred to a clean sterilized 1.5 mL microtube. To precipitate the DNA, 40  $\mu\text{L}$  of Sodium acetate (3M, pH 5.2) and 1000 $\mu\text{L}$  of absolute ethanol were added and centrifuged for 5 min at 12000rpm. The supernatant was

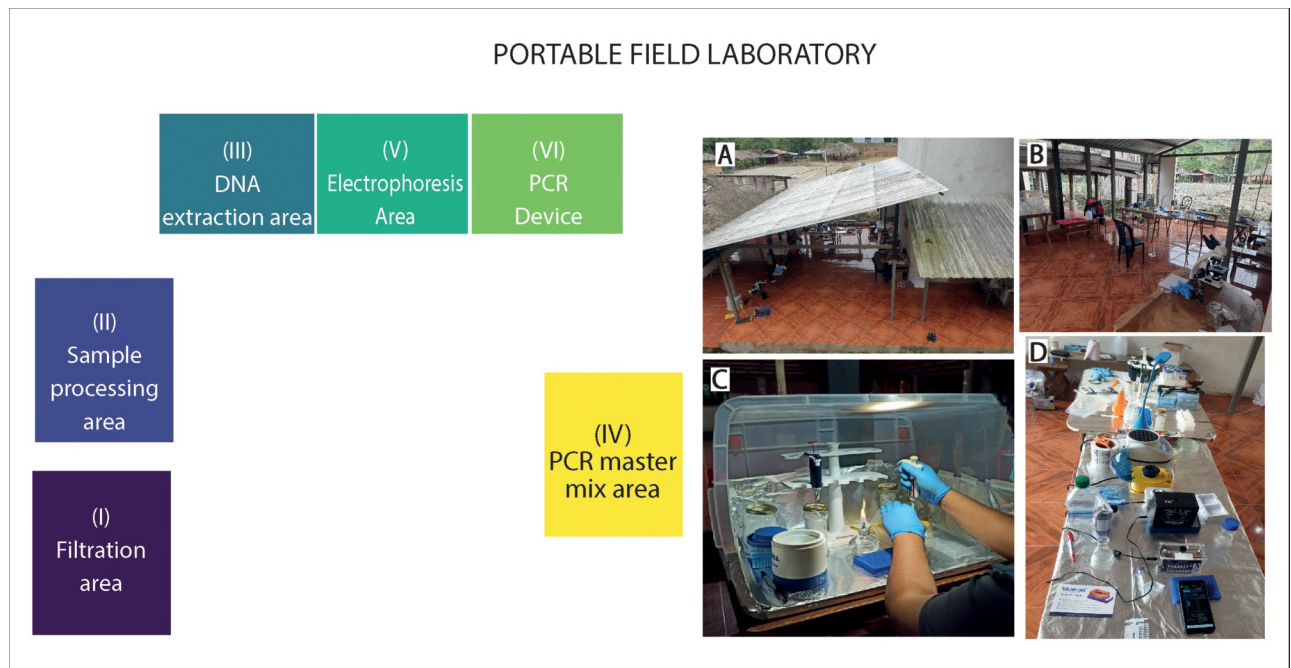

**Fig 1. A detailed view of the field laboratory is presented.** Numbers I, II, III, IV, V, and VI indicate the distribution of the various areas. Photo A shows the location in the field where the laboratory was set up. Photo B provides a general view of the laboratory, displaying all the areas. Photo C focuses on the PCR master mix area, while Photo D shows the table where the PCR mobile device, electrophoresis area, and DNA extraction areas were arranged.

<https://doi.org/10.1371/journal.pone.0299246.g001>

discarded, and the remaining droplets were removed with a clean, sterile micropipette tip after spinning. The microtube was subsequently dried in a thermoblock at 60°C until no liquid residue was observed. Finally, the DNA was resuspended in 25 µL of sterile MilliQ water. Due to logistical limitations, swab samples were only available for processing in the field laboratory; consequently, our results show the results obtained in the field laboratory.

For the extraction of DNA from the first-half nitrocellulose snippets in the field laboratory, we applied an adapted version of the Epicenter Masterpure DNA Purification Kit used by Riascos *et al.* [35]. The adaptations were the use of two sterile glass beads to the 1.5 ml tubes after homogenizing the samples, and changing the incubation time with proteinase K to thirty minutes and mixing by vortex every 10 minutes. The incubation time with RNase at 37°C was decreased to 10 minutes, and 175 µL of 5M ammonium acetate was added. The obtained DNA pellet was resuspended in 40 µL sterile demi-water instead of Epicentre's TE buffer.

DNA integrity was assessed in a blueGel electrophoresis system in a 0.8% agarose gel with 1X TBE and Gel Star™ Nucleic Acid Stain diluted 1:10,000 (Lonza, Lonza Rockland). For the identification of Bd in water and skin samples, we used the specific primers Chytr ITS1-3 (5' -CCTTGATATAATACAGTGTGC- CATATGTC-3') and Chytr-5.8S (5' -AGCCAAGAGATCCGTTGTCAA-3') [36]. Each PCR reaction contained 7.5µL of sterilized MilliQ H<sub>2</sub>O, 1µL of each primer at a concentration of 10mM, 12.5µL of TaqMan Environmental Master Mix 2.0 (Applied Biosystems, Cat. # 4396838), and 3µL of DNA for a total volume of 25µL per reaction. Thermal cycling was done in a mini8 thermal cycler (miniPCR bio) programmed as follows: initial denaturation at 95°C for 120s, 35 cycles of denaturation at 95°C for 60s, annealing at 60°C for 30s, extension at 72°C for 30s and final extension at 72°C for 5 minutes. Electrophoresis and visualization of PCR products were performed in a blueGel electrophoresis system (miniPCR Bio; <https://www.minipcr.com/>) using a 2% agarose gel in 1x



Tris/Borate/EDTA solution (TBE buffer) with GelStar™ Nucleic Acid Stain diluted 1:10,000 (10,000X in DMSO) (Lonza, Lonza Rockland).

DNA extraction from the second halves of the filters was performed at the university laboratory with the same DNA extraction and PCR protocols used in the field. PCR products were examined by electrophoresis in a 2% agarose gel with 1X TBE for 25 min at an electric potential difference of 135 V. After electrophoresis, the gel was stained with GelStar™ Nucleic Acid Stain diluted 1:10000 (Lonza, Lonza Rockland). If samples from skin swabs or water showed a 146 bp band, the amplification was considered successful for Bd DNA.

## Sequencing products

To evaluate the reliability and accuracy of Bd detection, we randomly selected samples with amplified PCR products for Sanger sequencing. Positive amplicons were sent for sequencing to Macrogen facilities (Seoul, Korea) to confirm the sequences of the Bd nuclear ribosomal region. Sequences were manually trimmed and cleaned in Geneious Prime® (ver. 2020.2.2). Sequencing and BLAST were used to confirm that the expected Bd sequence had been amplified (Update date: 2022/10/14, See [S2 File](#)). Accession numbers of sequences are detailed in [S1 Table](#) (\*SUB12413894, provisional). The prevalence was calculated by dividing the number of positive Bd samples by the total number of samples at each site.

## Results

### Detection of Bd from swabs in *Atelopus* species

During the monitoring, twelve individuals of *Atelopus* were founded and swabbed. Of these, ten tested positive for Bd (see [Table 1](#)). At the Cerro Negro site, the two specimens of *A. bomolochos* detected were positive for Bd. In the Cajas National Park at the Angas site, two out of three *A. nanay* specimens were positive for Bd, including one deceased specimen (HMOA 2399). This specimen found under a rock in a stream, exhibited lesions consistent with chytridiomycosis. Finally, for the Cerro de Hayas and Estero Arenas sites, six of the seven *A. balios* specimens were confirmed positive for Bd.

### Presence of Bd in water samples per site

In the field laboratory, the first half of the nitrocellulose snippets from the twelve samples were filtered, extracted and amplified. From these, six samples showed a positive signal for Bd. This procedure was replicated for the second halves in the university laboratory, where the positive and negative results obtained in the field were confirmed (see electrophoresis results in [Fig 2](#) and [Table 2](#)). The results from the field and university laboratories were further confirmed by Sanger sequencing, with the positive amplicons, showed 100% identity with Bd.

**Table 1. *Atelopus* species detection and Bd infection rates from amphibian swabs collected during the monitoring campaign in central Andes and coastal Ecuador.**

| Code | Field site                        | <i>Atelopus</i> species | # individuals found | # Testing positive for Bd |
|------|-----------------------------------|-------------------------|---------------------|---------------------------|
| A    | Cajas National Park/Sig Sig-Angas | <i>A. nanay</i>         | 3                   | 2                         |
| CN   | Cerro Negro                       | <i>A. bomolochos</i>    | 2                   | 2                         |
| CH   | Cerro de Hayas                    | <i>A. balios</i>        | 5                   | 4                         |
| EA   | Estero Arenas                     | <i>A. balios</i>        | 2                   | 2                         |

# = number

\* Bd = *Batrachochytrium dendrobatidis*.

<https://doi.org/10.1371/journal.pone.0299246.t001>

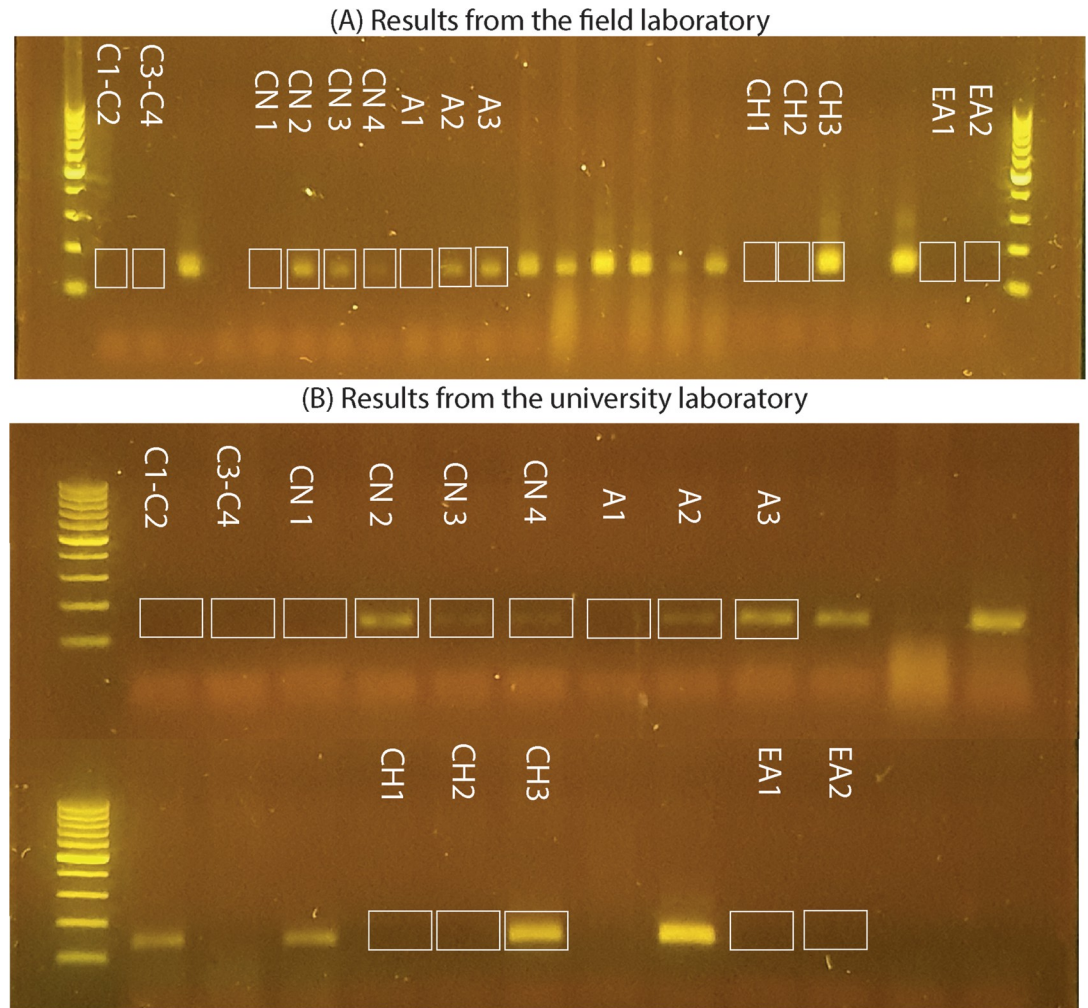

C : Negative control; CH: Cerro Haya location; CN Cerro Negro location; EA Estero Arena location; A Sig-Sig-Angas

**Fig 2.** Electrophoresis results of eDNA water samples processed (A) in the field and (B) in the laboratory.

<https://doi.org/10.1371/journal.pone.0299246.g002>

The highest prevalence of *Bd* was found in the highlands around 3,000 m.a.s.l. where two out of the three samples collected in the Cajas National Park (location Sig-Sig-Angas) tested positive (See Table 1). Additionally, *Bd* was present in three out of the four sites in Cerro Negro. In both sites, not human disturbances were observed. In contrast, locations at lower elevation (300 m.a.s.l) had lower *Bd* detection rates than the highlands. For the location, Cerro

**Table 2.** Field results of water samples and amphibian swabs from four locations in Central Andes of Ecuador.

| Code | Location Name                     | eDNA sites collected | Field lab <i>Bd</i> positives | University lab <i>Bd</i> positives | Concordance rate (%) |
|------|-----------------------------------|----------------------|-------------------------------|------------------------------------|----------------------|
| A    | Cajas National Park/Sig Sig-Angas | 3                    | 2                             | 2                                  | 100%                 |
| CN   | Cerro Negro                       | 4                    | 3                             | 3                                  | 100%                 |
| CH   | Cerro de Hayas                    | 3                    | 1                             | 1                                  | 100%                 |
| EA   | Estero Arenas                     | 2                    | 0                             | 0                                  | 100%                 |

\* *Bd* = *Batrachochytrium dendrobatidis*.

eDNA = environmental DNA

<https://doi.org/10.1371/journal.pone.0299246.t002>

de Hayas Arena, one out of the three samples showed a positive amplification for Bd. While in the location Estero Arena, Bd was absent from the water two sample collected. At both coastal sites, human disturbance was observed, including the presence of crops and livestock near the monitoring sites.

## Discussion

### The endangered toads *Atelopus* and the field laboratory as a conservation research instrument

Here we report the results of using a field laboratory for the detection of Bd at four sites in the Ecuadorian Andes and Coastal lowlands. Our results demonstrate that a basic laboratory (i.e. PCR instead of qPCR) combined with our sample processing methods is accurate and rapid (6–8 hours including transportation of samples) for detecting Bd in three critically endangered Andean toads. This applies to remote area characterized by diverse environments and different levels of disturbance. Moreover these results indicate that a field laboratory is just as effective as university laboratories in detecting Bd from environmental samples using molecular tools.

The *Atelopus* frogs examined in this study are classified as critically endangered toads [9]. Before the recent rediscovery of *A. balios* and *A. bomolochos*, both species had last been recorded in 1995 and 1990, respectively [18, 32]. The locations sampled for *A. balios* and *A. nanay* represent the last known habitats where these species have been observed. In addition to Bd presence, other threats to these species were identified. For example, in Cerro de Hayas and Estero Arenas, deforestation, cattle grazing and agro-chemicals were noted during our monitoring.

The efficiency of Bd detection in the field and the consistency of results in a university laboratory, without compromising accuracy, suggest that field-based devices are effective tools for rapid field pathogen detection in threatened amphibians. This capability is crucial for the implementation of disease surveillance and control strategies. Consequently, future monitoring efforts could expand to include the study of the 44 species across 5 families that have tested positive for Bd in 10 out of the 24 provinces of Ecuador (S2 Table). This expansion could be complemented by ecosystem monitoring through water physical chemical sampling.

### Influence of environmental and methodological factors in PCR amplification for water samples

Although eDNA results were consistent between the field and university laboratories, there were instances where samples from certain locations tested negative for Bd. These results could be explained by various factors such as the absence of the target organism (Bd) at the site, low DNA concentration, PCR inhibition or the influence of abiotic and biotic factors [37–39]. For instance, the coastal areas sampled for this study, where a higher frequency of negative results in eDNA water samples was recorded, were characterized by the presence of traditional crops like cocoa and banana. These crops often involve significant use of pesticides and fertilizers [40, 41]. In contrast, the Andean sites, which exhibited fewer negative results, are protected areas with low human impact.

Given this observations, future studies should explore the influence of external factors, such as pesticides (i.e. dithiocarbamates [42]) and fertilizers, on the stability and degradation of eDNA in aquatic ecosystems for tropical countries, especially in relation to their potential role causing zoospore mortality, increasing host susceptibility, and damaging eDNA [43, 44].



## Needs, challenges, and advantages of field molecular laboratories in remote areas

Early detection of invasive or pathogenic species in the field with molecular accuracy is key for monitoring and surveillance for biodiversity conservation [45]. However, molecular techniques commonly used for pathogen detection, such as DNA extraction and PCR assays, often require laboratories with sophisticated and costly equipment. In this context, field laboratories and portable devices have emerged as promising tools for the rapid and accurate detection of emerging pathogens [46]. The advantages of these portable devices include their ease of transportation to sampling site, convenient handling and immediate, results [29, 47].

Filtration of water samples and eDNA extraction close to amphibian collection sites significantly reduce the time between sampling and filtration. Thereby increasing the potential to maximize eDNA recovery from fresh samples [48]. Furthermore, the use of portable equipment mitigates the influence of certain detrimental factors on the viability of eDNA samples. In particular, maintaining the cold chain ( $\sim -4^{\circ}\text{C}$ ) during the transport of eDNA samples from remote localities to the laboratory is considered a challenge because high temperatures negatively affect DNA concentration [49]. For example, for this specific study in Ecuador, storing and transporting water samples for environmental DNA analysis to a research facility or university laboratory took two to three days by road. Other advantages include the use of basic standardized molecular techniques in low-cost equipment for DNA extraction and conventional PCR, which can overcome many of the problems associated with the scarcity of high-cost laboratory equipment in emerging economies, thus helping to increase awareness and access to modern, portable technology, further building and strengthening research capacity in developing countries [25].

In Ecuador, as in other tropical countries with developing economies, equipment and supplies from local suppliers can be up to two to five times higher than in the US or Europe [50]. This, couple with limited access to grants, inadequate budgets, and lack of laboratory infrastructure and equipment, hinders the monitoring of emerging pathogens' impact. For example, a typical national grant provides approximately US\$ 5,000 to US\$ 40,000 for total project costs (i.e. CEDIA <https://cedia.edu.ec/beneficio/fondo-idi-universidades/financiamiento/>), while the local cost for setting up a basic molecular laboratory ranges from US\$ 10,000 to US\$ 30,000. Consequently, about 80–90% of the project budget would need to be allocated to equipment purchase, limiting the budget allocation for sampling, reagents, and external services (e.g., Sanger sequencing), often rendering projects unfeasible.

The portable equipment used in our study, the miniPCR DNA Discovery System, which costs approximately US\$ 950, includes a miniPCR mini16 thermal cycler, a blueGel electrophoresis system and a 2–20  $\mu\text{l}$  micropipette [51]. This represents a lower purchase cost compared to standard university laboratory equipment. In addition, access to the product portfolio available abroad (reagents, equipment, laboratory supplies) is limited in Ecuador due to high import taxes, few distributors, and few available brands.

Globally, the impact of Bd on frog communities remains largely unstudied [9, 52, 53]. Although various strategies can be implemented to control the impact of Bd in the amphibians analysed, the first step requires a detailed identification of the areas and species affected. Portability, local availability and affordability were the main reasons for selecting the equipment used in this research. The implementation of low-cost technologies can facilitate sampling campaigns for pathogen or disease surveillance and become a fundamental tool for risk assessment and management [28], conservation of endangered species (e.g., treatment of infected individuals), and development of reintroduction or eradication plans (invasive species) [54, 55]. Therefore, it is crucial to apply methods to integrate the use of low-cost technologies in

the study of biological invasions, invasive species, emerging infectious diseases, and zoonoses [9] in the context of rapid and effective management of a lethal fungi that pose a global threat to diversity [56]. By leveraging the development of portable sequencers such as Minion ONT and improving protocols with cutting-edge biotechnology for real-time sequencing [28], we are helping to establish a field methods for monitoring of emerging diseases and threatened species as an integral part of future biodiversity genomics applied to conservation.

## Conclusions

This study underscores the critical importance of early and accurate detection of invasive or pathogenic species, such as *Batrachochytrium dendrobatidis* (Bd), in endangered amphibian populations. Our research demonstrates the viability of using portable, low-cost technologies for molecular detection in remote areas. This approach effectively addresses the logistical and resource challenges that are often encountered in developing countries, including Ecuador. Our findings indicate that field laboratories and portable devices are effective in detecting Bd in *Atelopus* toads and their aquatic ecosystems through eDNA analysis in a tropical context. The application of these tools enabled rapid pathogen detection, which is crucial for timely disease surveillance, risk assessment, and the formulation of conservation strategies.

## Supporting information

**S1 File. A standardized protocol to extract eDNA (water samples), DNA (SWABs), and amplifying PCR products to detect Bd with portable devices.**

(DOCX)

**S2 File. Sequences (.fasta) of positive Bd validated in BLASTn from SWABs (2395, 2397, 2420, 2421) and water (1a-16a) samples in the study area. See S1 Table for specimens, access numbers in Genbank and water sample codes.**

(DOCX)

**S1 Table. Locations for sampling swabs on *Atelopus* specimens and water from streams in the study area.** Detailed data on codes, access numbers to Genbank, GPS coordinates, altitude, temperature, and relative humidity (RH) are provided.

(XLSX)

**S2 Table. Literature review of amphibians with detected Bd in Ecuador.**

(DOCX)

## Acknowledgments

We thank Jackeline Arpi, Naty Aguilar, Evelyn Ocampos, Alex Arias, Walter Quilumbaquin and Noemí Torres for their support and assistance in field and laboratory work. We thank the reviewers whose comments, suggestions, and revisions improved the manuscript.

## Author Contributions

**Conceptualization:** Lenin R. Riascos-Flores, Leopoldo Naranjo-Briceño, Jomira K. Yáñez-Galarza, Christine Van der Heyden, H. Mauricio Ortega-Andrade.

**Data curation:** Lenin R. Riascos-Flores, Julio Bonilla, Leopoldo Naranjo-Briceño, Katherine Apunte-Ramos, Grace C. Reyes-Ortega, Andrea Carrera-Gonzalez, Jomira K. Yáñez-Galarza, Fausto Siavichay Pesántez, H. Mauricio Ortega-Andrade.

**Formal analysis:** Lenin R. Riascos-Flores, Julio Bonilla, Leopoldo Naranjo-Briceño, Katherine Apunte-Ramos, Grace C. Reyes-Ortega, Marcela Cabrera, Andrea Carrera-Gonzalez, Jomira K. Yáñez-Galarza, H. Mauricio Ortega-Andrade.

**Funding acquisition:** Julio Bonilla, Fausto Siavichay Pesántez, Peter Goethals, Jorge Celi, Christine Van der Heyden, H. Mauricio Ortega-Andrade.

**Investigation:** Lenin R. Riascos-Flores, Leopoldo Naranjo-Briceño, Katherine Apunte-Ramos, Grace C. Reyes-Ortega, Marcela Cabrera, José F. Cáceres-Andrade, Andrea Carrera-Gonzalez, Jomira K. Yáñez-Galarza, Fausto Siavichay Pesántez, Luis A. Oyagata-Cachimuel, Peter Goethals, Christine Van der Heyden, H. Mauricio Ortega-Andrade.

**Methodology:** Lenin R. Riascos-Flores, Leopoldo Naranjo-Briceño, Katherine Apunte-Ramos, Grace C. Reyes-Ortega, José F. Cáceres-Andrade, Andrea Carrera-Gonzalez, Jomira K. Yáñez-Galarza, Peter Goethals, H. Mauricio Ortega-Andrade.

**Project administration:** Jorge Celi, Christine Van der Heyden, H. Mauricio Ortega-Andrade.

**Resources:** Julio Bonilla, Andrea Carrera-Gonzalez, Fausto Siavichay Pesántez, Christine Van der Heyden, H. Mauricio Ortega-Andrade.

**Software:** H. Mauricio Ortega-Andrade.

**Supervision:** Lenin R. Riascos-Flores, Leopoldo Naranjo-Briceño, Andrea Carrera-Gonzalez, Christine Van der Heyden, H. Mauricio Ortega-Andrade.

**Validation:** Lenin R. Riascos-Flores, Julio Bonilla, Leopoldo Naranjo-Briceño, Andrea Carrera-Gonzalez, Jomira K. Yáñez-Galarza, Christine Van der Heyden, H. Mauricio Ortega-Andrade.

**Visualization:** Lenin R. Riascos-Flores, Leopoldo Naranjo-Briceño, Christine Van der Heyden, H. Mauricio Ortega-Andrade.

**Writing – original draft:** Lenin R. Riascos-Flores, Julio Bonilla, Leopoldo Naranjo-Briceño, Jomira K. Yáñez-Galarza, Peter Goethals, Jorge Celi, Christine Van der Heyden, H. Mauricio Ortega-Andrade.

**Writing – review & editing:** Lenin R. Riascos-Flores, Julio Bonilla, Leopoldo Naranjo-Briceño, Katherine Apunte-Ramos, Grace C. Reyes-Ortega, Marcela Cabrera, José F. Cáceres-Andrade, Andrea Carrera-Gonzalez, Jomira K. Yáñez-Galarza, Fausto Siavichay Pesántez, Luis A. Oyagata-Cachimuel, Peter Goethals, Jorge Celi, Christine Van der Heyden, H. Mauricio Ortega-Andrade.

## References

1. Kolby JE, Daszak P. The Emerging Amphibian Fungal Disease, Chytridiomycosis: A Key Example of the Global Phenomenon of Wildlife Emerging Infectious Diseases. In: Scheld WM, Hughes JM, Whitley RJ, editors. *Emerging Infections 10*. United States of America: American Society for Microbiology; 2016. p. 385–407.
2. Berger L, Speare R, Daszak P, Green DE, Cunningham AA, Goggin L, et al. Chytridiomycosis Causes Amphibian Mortality Associated with Population Declines in the Rain Forests of Australia and Central America. *Pnas*. 1998; 95(15):9031–6. <https://doi.org/10.1073/pnas.95.15.9031> PMID: 9671799
3. Voyles J, Rosenblum EB, Berger L. Interactions between *Batrachochytrium dendrobatidis* and its amphibian hosts: A review of pathogenesis and immunity. *Microbes and Infection*. 2011; 13(1):25–32. <https://doi.org/10.1016/j.micinf.2010.09.015> PMID: 20951224
4. Lips KR. Overview of chytrid emergence and impacts on amphibians. *Philosophical Transactions of the Royal Society B: Biological Sciences*. 2016; 371(1709):20150465. <https://doi.org/10.1098/rstb.2015.0465> PMID: 28080989

5. Scheele BC, Pasmans F, Skerratt LF, Berger L, Martel A, Beukema W, et al. Amphibian fungal panzootic causes catastrophic and ongoing loss of biodiversity. *Science*. 2019; 363(6434):1459–63. <https://doi.org/10.1126/science.aav0379> PMID: 30923224
6. Lambert MR, Womack MC, Byrne AQ, Hernández-Gómez O, Noss CF, Rothstein AP, et al. Comment on “Amphibian fungal panzootic causes catastrophic and ongoing loss of biodiversity”. *Science*. 2020; 367(6484):eaay1838. <https://doi.org/10.1126/science.aay1838> PMID: 32193293
7. Olson DH, Aanensen DM, Ronnenberg KL, Powell CI, Walker SF, Bielby J, et al. Mapping the global emergence of *Batrachochytrium dendrobatidis*, the amphibian chytrid fungus. *PloS one*. 2013; 8(2): e56802. <https://doi.org/10.1371/journal.pone.0056802> PMID: 23463502
8. Alford RA, Dixon PM, Pechmann JH. Global amphibian population declines. *Nature*. 2001; 412(6846):499–500.
9. Ortega-Andrade HM, Rodes Blanco M, Cisneros-Heredia DF, Guerra Arévalo N, López de Vargas-Machuca KG, Sánchez-Nivicela JC, et al. Red List assessment of amphibian species of Ecuador: A multidimensional approach for their conservation. *PLOS ONE*. 2021; 16(5):e0251027. <https://doi.org/10.1371/journal.pone.0251027> PMID: 33956885
10. Romero G, Bermúdez S, Sánchez-Yumbo A, Yáñez J, Ortega-Andrade HM, Naranjo-Briceño L. Amphibian chytridiomycosis, a lethal pandemic disease caused by the killer fungus *Batrachochytrium dendrobatidis*: New approaches to host defense mechanisms and techniques for detection and monitoring. *Bionatura*. 2021; 6(1):1628–36.
11. Bosch J, Thumsová B, López-Rojo N, Pérez J, Alonso A, Fisher MC, et al. Microplastics increase susceptibility of amphibian larvae to the chytrid fungus *Batrachochytrium dendrobatidis*. *Scientific Reports*. 2021; 11(1):22438. <https://doi.org/10.1038/s41598-021-01973-1> PMID: 34789869
12. Piovio-Scott J, Pope KL, Lawler SP, Cole EM, Foley JE. Factors related to the distribution and prevalence of the fungal pathogen *Batrachochytrium dendrobatidis* in *Rana cascadae* and other amphibians in the Klamath Mountains. *Biological Conservation*. 2011; 144(12):2913–21.
13. Bletz MC, Rebollar EA, Harris RN. Differential efficiency among DNA extraction methods influences detection of the amphibian pathogen *Batrachochytrium dendrobatidis*. *Diseases of Aquatic Organisms*. 2015; 113(1):1–8. <https://doi.org/10.3354/dao02822> PMID: 25667331
14. Soto-Azat C, Clarke BT, Fisher MC, Walker SF, Cunningham AA. Non-invasive sampling methods for the detection of *Batrachochytrium dendrobatidis* in archived amphibians. *Diseases of Aquatic Organisms*. 2009; 84(2):163–6. <https://doi.org/10.3354/dao02029> PMID: 19476287
15. Boyle DG, Boyle DB, Olsen V, Morgan JAT, Hyatt AD. Rapid quantitative detection of chytridiomycosis (*Batrachochytrium dendrobatidis*) in amphibian samples using real-time Taqman PCR assay. *Diseases of Aquatic Organisms*. 2004; 60(2):141–8. <https://doi.org/10.3354/dao060141> PMID: 15460858
16. IUCN. The IUCN Red List of Threatened Species 2022 [updated 2020; cited 2021 27/03/2022]. Available from: <https://www.iucnredlist.org>.
17. MAATE. Proyecto par la Conservación de Anfibios y Recursos Genéticos- PARG Quito, Ecuador: Ministerio del Ambiente, Agua y Transición Ecológica; 2023 [cited 2023 25/07/2023]. Available from: <https://www.ambiente.gob.ec/ecuador-el-pais-mas-diverso-en-anfibios/>.
18. Ron SR, Merino-Viteri A, Ortiz DA. Anfibios del Ecuador. Version 2023.0. Quito, Ecuador: Museo de Zoología, Pontificia Universidad Católica del Ecuador; 2023 [15/04/2023]. Available from: <https://bioweb.bio/faunaweb/amphibiaweb>.
19. Menéndez-Guerrero PA, Davies TJ, Green DM. Extinctions of Threatened Frogs may Impact Ecosystems in a Global Hotspot of Anuran Diversity. *Herpetologica*. 2020; 76(2):121–31. <https://doi.org/10.1655/0018-0831-76.2.121>
20. Menéndez-Guerrero PA, Graham CH. Evaluating multiple causes of amphibian declines of Ecuador using geographical quantitative analyses. *Ecography*. 2013; 36(7):756–69. <https://doi.org/10.1111/j.1600-0587.2012.07877.x>
21. Bishop P, Angulo A, Lewis J, Moore R, Rabb G, Moreno JG. The Amphibian Extinction Crisis-what will it take to put the action into the Amphibian Conservation Action Plan? *Surveys and Perspectives Integrating Environment and Society*. 2012; 2012(5.2):97–111.
22. Haver M, Le Roux G, Friesen J, Loyau A, Vredenburg VT, Schmeller DS. The role of abiotic variables in an emerging global amphibian fungal disease in mountains. *Science of the Total Environment*. 2022; 815:152735. <https://doi.org/10.1016/j.scitotenv.2021.152735> PMID: 34974000
23. Deknock A, Goethals P, Croubels S, Lens L, Martel A, Pasmans F. Towards a food web based control strategy to mitigate an amphibian panzootic in agricultural landscapes. *Global Ecology and Conservation*. 2020; 24(2020):e01314–e. <https://doi.org/10.1016/j.gecco.2020.e01314>
24. Nunez MA, Pauchard A. Biological invasions in developing and developed countries: does one model fit all? *Biological invasions*. 2010; 12:707–14.



25. Galina CS, Martínez JF, Murphy BD. Constraints on Research in Biological and Agricultural Science in Developing Countries: The Example of Latin America. *Publications*. 2023; 11(2):22. <https://doi.org/10.3390/publications11020022>
26. Krehenwinkel H, Pomerantz A, Prost S. Genetic Biomonitoring and Biodiversity Assessment Using Portable Sequencing Technologies: Current Uses and Future Directions. *Genes*. 2019; 10(11):858. <https://doi.org/10.3390/genes10110858> PMID: 31671909
27. Fujiyoshi S, Yarimizu K, Miyashita Y, Rilling J, Acuña JJ, Ueki S, et al. Suitcase Lab: new, portable, and deployable equipment for rapid detection of specific harmful algae in Chilean coastal waters. *Environmental Science and Pollution Research*. 2021; 28(11):14144–55. <https://doi.org/10.1007/s11356-020-11567-5> PMID: 33206296
28. Quilumbaquin W, Carrera-Gonzalez A, Van der heyden C, Ortega-Andrade HM. Environmental DNA and visual encounter surveys for amphibian biomonitoring in aquatic environments of the Ecuadorian Amazon. *PeerJ*. 2023; 11:e15455. <https://doi.org/10.7717/peerj.15455> PMID: 37456876
29. Kamoroff C, Goldberg CS, Grasso RL. Rapid detection of amphibian chytrid fungus *Batrachochytrium dendrobatidis* using in situ DNA extraction and a handheld mobile thermocycler. *Diseases of Aquatic Organisms*. 2022; 152(2022):99–108. <https://doi.org/10.3354/dao03708> PMID: 36519681
30. Cáceres-Andrade J. Análisis Exploratorio de datos para desarrollar propuestas de conservación de la comunidad de Anfibios referentes al *Batrachochytrium dendrobatidis* en el Parque Nacional Cajas, Cuenca-Ecuador.: Universidad del Azuay; 2014.
31. Torres-Sarango N. Implementación y evaluación de un ensayo de PCR para la detección del agente causal de la quitridiomycosis: Universidad de Cuenca; 2019.
32. Ron SR, Merino A. Amphibian declines in Ecuador: overview and first report of chytridiomycosis from South America. *Froglog*. 2000; 42(2000):2–3.
33. Angulo A, Rueda-Almondacid JV, Rodríguez-Mahecha JV, La Marca E, editors. Técnicas de inventario y monitoreo para los anfibios de la Región Tropical Andina. Bogotá, Colombia: Conservación internacional. Serie Manuales de Campo N° 2. Panamericana Formas e Impresos S.A.; 2006.
34. Geerts AN, Boets P, Van den Heede S, Goethals P, Van der heyden C. A search for standardized protocols to detect alien invasive crayfish based on environmental DNA (eDNA): A lab and field evaluation. *Ecological Indicators*. 2018; 84(2017):564–72. <https://doi.org/10.1016/j.ecolind.2017.08.068>
35. Riascos-Flores L, Geerts A, Oña T, Goethals P, Cevallos-Cevallos J, Berghe WV, et al. DNA-based monitoring of the alien invasive North American crayfish *Procambarus clarkii* in Andean lakes (Ecuador). *Limnologica*. 2018; 70(2018):20–5.
36. Shin J, Bataille A, Kosch TA, Waldman B. Swabbing often fails to detect amphibian chytridiomycosis under conditions of low infection load. *PLoS One*. 2014; 9(10): e111091. <https://doi.org/10.1371/journal.pone.0111091> PMID: 25333363
37. Spens J, Evans AR, Halfmaerten D, Knudsen SW, Sengupta ME, Mak SST, et al. Comparison of capture and storage methods for aqueous microbial eDNA using an optimized extraction protocol: advantage of enclosed filter. *Methods in Ecology and Evolution*. 2017; 8(5):635–45. <https://doi.org/10.1111/2041-210X.12683>
38. Taberlet P, Bonin A, Zinger L, Coissac E. *Environmental DNA: For biodiversity research and monitoring*: Oxford University Press; 2018. 247 p.
39. Stewart KA. Understanding the effects of biotic and abiotic factors on sources of aquatic environmental DNA. *Biodiversity and Conservation*. 2019; 28(5):983–1001. <https://doi.org/10.1007/s10531-019-01709-8>
40. Deknock A, De Troyer N, Houbraken M, Dominguez-Granda L, Nolivos I, Van Echelpoel W, et al. Distribution of agricultural pesticides in the freshwater environment of the Guayas river basin (Ecuador). *Science of The Total Environment*. 2019; 646(2019):996–1008. <https://doi.org/10.1016/j.scitotenv.2018.07.185> PMID: 30235652
41. Riascos-Flores L, Bruneel S, Van der Heyden C, Deknock A, Van Echelpoel W, Forio MAE, et al. Polluted paradise: Occurrence of pesticide residues within the urban coastal zones of Santa Cruz and Isabela (Galapagos, Ecuador). *Science of The Total Environment*. 2021; 763(2021):142956. <https://doi.org/10.1016/j.scitotenv.2020.142956> PMID: 33129533
42. Farag NS, Balabel NMA. Effect of pesticide(s) carryover on results of polymerase chain reaction and multiplex-PCR for diagnosis of potato bacterial pathogens. *Asian Journal of Plant Pathology*. 2014; 8(1). <https://doi.org/10.3923/ajppaj.2014.1.9>
43. Hanlon SM, Kerby JL, Parris MJ. Unlikely remedy: Fungicide clears infection from pathogenic fungus in larval southern leopard frogs (*Lithobates sphenoccephalus*). *PLoS ONE*. 2012; 7(8):1–8. <https://doi.org/10.1371/journal.pone.0043573> PMID: 22912890

44. McMahon TA, Brannelly LA, Chatfield MWH, Johnson PTJ, Joseph MB, McKenzie VJ, et al. Chytrid fungus *Batrachochytrium dendrobatidis* has nonamphibian hosts and releases chemicals that cause pathology in the absence of infection. *Proceedings of the National Academy of Sciences of the United States of America*. 2013; 110(1):210–5. <https://doi.org/10.1073/pnas.1200592110> PMID: 23248288
45. Trebitz AS, Hoffman JC, Darling JA, Pilgrim EM, Kelly JR, Brown EA, et al. Early detection monitoring for aquatic non-indigenous species: Optimizing surveillance, incorporating advanced technologies, and identifying research needs. *Journal of Environmental Management*. 2017; 202(2017):299–310. <https://doi.org/10.1016/j.jenvman.2017.07.045>.
46. González-González E, Mendoza-Ramos JL, Pedroza SC, Cuellar-Monterrubio AA, Márquez-Ipiña AR, Lira-Serhan D, et al. Validation of use of the miniPCR thermocycler for Ebola and Zika virus detection. *PLoS ONE*. 2019; 14(5). <https://doi.org/10.1371/journal.pone.0215642> PMID: 31071117
47. Guevara EE, Frankel DC, Ranaivonasy J, Richard AF, Ratsirarson J, Lawler RR, et al. A simple, economical protocol for DNA extraction and amplification where there is no lab. *Conservation Genetics Resources*. 2018; 10(1). <https://doi.org/10.1007/s12686-017-0758-5>
48. Majaneva M, Diserud OH, Eagle SHC, Boström E, Hajibabaei M, Ekrem T. Environmental DNA filtration techniques affect recovered biodiversity. *Scientific Reports*. 2018; 8(1):1–11. <https://doi.org/10.1038/s41598-018-23052-8> PMID: 29549344
49. Eichmiller JJ, Best SE, Sorensen PW. Effects of Temperature and Trophic State on Degradation of Environmental DNA in Lake Water. *Environmental Science and Technology*. 2016; 50(4). <https://doi.org/10.1021/acs.est.5b05672> PMID: 26771292
50. Ciocca DR, Delgado G. The reality of scientific research in Latin America; an insider's perspective. *Cell Stress and Chaperones*. 2017; 22(6):847–52. <https://doi.org/10.1007/s12192-017-0815-8> PMID: 28584930
51. MiniPCR. MiniPCR® DNA Discovery System™: MiniPCR; 2023 [cited 02/08/2023 02/08/2023]. Available from: <https://www.minipcr.com/product/minipcr-dna-discovery-system/>.
52. Castro Monzon F, Rödel M-O, Jeschke JM. Tracking *Batrachochytrium dendrobatidis* Infection Across the Globe. *EcoHealth*. 2020; 17(3):270–9. <https://doi.org/10.1007/s10393-020-01504-w> PMID: 33201333
53. Luedtke JA, Chanson J, Neam K, Hobin L, Maciel AO, Catenazzi A, et al. Ongoing declines for the world's amphibians in the face of emerging threats. *Nature*. 2023; 622(7982):308–14. <https://doi.org/10.1038/s41586-023-06578-4> PMID: 37794184
54. DiRenzo GV, Chen R, Ibsen K, Toothman M, Miller AJ, Gershman A, et al. Investigating the potential use of an ionic liquid (1-Butyl-1-methylpyrrolidinium bis(trifluoromethylsulfonyl)imide) as an antifungal treatment against the amphibian chytrid fungus, *Batrachochytrium dendrobatidis*. *PLoS ONE*. 2020; 15(4):1–18. <https://doi.org/10.1371/journal.pone.0231811> PMID: 32302369
55. Ogden NH, Wilson JR, Richardson DM, Hui C, Davies SJ, Kumschick S, et al. Emerging infectious diseases and biological invasions: a call for a One Health collaboration in science and management. *Royal Society Open Science*. 2019; 6(3):181577. <https://doi.org/10.1098/rsos.181577> PMID: 31032015
56. Falaschi M, Melotto A, Manenti R, Ficetola GF. Invasive Species and Amphibian Conservation. *Herpetologica*. 2020; 76(2):216–27, 12.
